# Evaluating Metagenome Assembly on a Simple Defined Community with Many Strain Variants

Sherine Awad<sup>1</sup>, Luiz Irber<sup>1</sup>, C. Titus Brown<sup>1\*</sup>

<sup>1</sup>**Department of Population Health and Reproduction**

University of California, Davis

Davis, CA 95616 USA

\* E-mail: [ctbrown@ucdavis.edu](mailto:ctbrown@ucdavis.edu)

July 2, 2017

## Abstract

We evaluate the performance of three metagenome assemblers, IDBA, MetaSPAdes, and MEGAHIT, on short-read sequencing of a defined “mock” community containing 64 genomes (Shakya et al. (2013)). We update the reference metagenome for this mock community and detect several additional genomes in the read data set. We show that strain confusion results in significant loss in assembly of reference genomes that are otherwise completely present in the read data set. In agreement with previous studies, we find that MEGAHIT performs best computationally; we also show that MEGAHIT tends to recover larger portions of the strain variants than the other assemblers.

# 16 Introduction

17 Metagenomics refers to sequencing of DNA from a mixture of organisms,  
18 often from an environmental or uncultured sample. Unlike whole genome  
19 sequencing, metagenomics targets a mixture of genomes, which introduces  
20 metagenome-specific challenges in analysis [1]. Most approaches to analyz-  
21 ing metagenomic data rely on mapping or comparing sequencing reads to  
22 reference sequence collections. However, reference databases contain only a  
23 small subset of microbial diversity [2], and much of the remaining diversity  
24 is evolutionarily distant and search techniques may not recover it [3].

25 As sequencing capacity increases and sequence data is generated from  
26 many more environmental samples, metagenomics is increasingly using *de*  
27 *novo* assembly techniques to generate new reference genomes and metagenomes  
28 [4]. There are a number of metagenome assemblers that are widely used -  
29 see [5] for an overview of the available software, and [1] for a review of the  
30 different assembler methodologies. However, evaluating the results of these  
31 assemblers is challenging due to the general lack of good quality reference  
32 metagenomes.

33 Moya et al. in [6] evaluated metagenome assembly using two simulated  
34 454 viral metagenome and six assemblers. The assemblies were evaluated  
35 based on several metrics including N50, percentages of reads assembled, ac-  
36 curacy when compared to the reference genome. In addition to, chimeras per  
37 contigs and the effect of assembly on taxonomic and functional annotations.

38 Mavromatis et al. in [7] provided a benchmark study to evaluate the  
39 fidelity of metagenome processing methods. The study used simulated  
40 metagenomic data sets constructed at different complexity levels. The datasets  
41 were assembled using Phrap v3.57, Arachne v.2 [8] and JAZZ [9]. This study  
42 evaluates assembly, gene prediction, and binning methods. However, the  
43 study did not evaluate the assembly quality against a reference genome.

44 Rangwala et al. in [10] presented an evaluation study of metagenome  
45 assembly. The study used a de Bruijn graph based assembler ABYSS [11] to  
46 assemble simulated metagenome reads of 36 bp. The data set is classified at  
47 different complexity levels. The study compared the quality of the assembly  
48 of the data sets in terms of contig length and assembly accuracy. The  
49 study also took into consideration the effect of kmer size and the degree of  
50 chimericity. However, the study evaluated the assembly based on only one  
51 assembler. Also, both previous studies used simulated data, which may lack  
52 confounders of assembly such as sequencing artifacts and GC bias.

53 In a landmark study, Shakya et al. (2013) constructed a synthetic com-

54 munity of organisms by mixing DNA isolated from individual cultures of  
55 64 bacteria and archaea, including a variety of strains across a range of  
56 nucleotide distances [12]. In addition to performing 16s amplicon analy-  
57 sis and doing 454 sequencing, the authors shotgun-sequenced the mixture  
58 with Illumina. While the authors concluded that this metagenomic sequenc-  
59 ing generally outperformed amplicon sequencing, they did not conduct an  
60 assembly based analysis. This data set was also used in several other eval-  
61 uation studies, including gbtools for binning [13] and benchmarking of the  
62 MEGAHIT assembler [14].

63 More recently, several benchmark studies systematically evaluated metagenome  
64 assembly of short reads. The Critical Assessment of Metagenome Interpre-  
65 tation (CAMI) collaboration benchmarked a number of metagenome assem-  
66 blers on several data sets of varying complexity, evaluating recovery of novel  
67 genomes and multiple strain variants [3]. Notably, CAMI concluded that  
68 “The resolution of strain-level diversity represents a substantial challenge  
69 to all evaluated programs.” Another recent study evaluated eight assem-  
70 blers on nine environmental metagenomes and three simulated data sets  
71 and provided a workflow for choosing a metagenome assembler based on  
72 the biological goal and computational resources available [15]. [5] explored  
73 metagenome assembler performance on a pair of real data sets, again con-  
74 cluding that the biological goal and computational resources defined the  
75 choice of assembler. Also see [16] for an analysis of a previously generated  
76 HMP benchmark data set; however, the Illumina reads used for this study  
77 are much shorter than current sequencing and are arguably not relevant for  
78 future studies.

79 In this study, we extend previous work by delving into questions of  
80 chimeric misassembly and strain recovery in the Shakya et al. (2013) data  
81 set. First, we update the list of reference genomes for Shakya et al. to in-  
82 clude the latest GenBank assemblies along with plasmids. We then compare  
83 IDBA [17], MetaSPAdes [18], and MEGAHIT [19] performance on assem-  
84 bling this short-read data set, and explore concordance in recovery between  
85 the three assemblers. We describe the effects of “strain confusion” between  
86 multiple strains. We also detect and analyze several previously unreported  
87 strains and genomes in the Shakya et al. data set. We find that in the ab-  
88 sence of closely related genomes, all three metagenome assemblers recover  
89 95% or more of known reference genomes. However, in the presence of  
90 closely related genomes, these three metagenome assemblers vary widely in  
91 their performance and, in extreme cases, can fail to recover the majority of  
92 some genomes even when they are completely present in the reads. Our re-

port provides strong guidance on choice of assemblers and extends previous analyses of this low-complexity metagenome benchmarking data set.

## Datasets

We used a diverse mock community data set constructed by pooling DNA from 64 species of bacteria and archaea and sequencing them with Illumina HiSeq. The raw data set consisted of 109,629,496 reads from Illumina HiSeq 101 bp paired-end sequencing (2x101) with an untrimmed total length of 11.07 Gbp and an estimated fragment size of 380 bp [12].

The original reads are available through the NCBI Sequence Read Archive at Accession SRX200676. We updated the 64 reference genomes sets from NCBI GenBank using the latest available assemblies with plasmid content (June 2017); the accession numbers are available as `accession-list-ref.txt` in the Zenodo repository, DOI: 10.5281/zenodo.821919. For convenience, the updated reference genome collection is available for download at the archival URL <https://osf.io/vbhy5/>.

## Methods

The analysis code and run scripts for this paper are written in Python and bash, and are available at <https://github.com/dib-lab/2016-metagenome-assembly-eval/> (archived at Zenodo DOI: 10.5281/zenodo.821919). The scripts and overall pipeline were examined by the first and senior authors for correctness. In addition, the bespoke reference-based analysis scripts were tested by running them on a single-colony *E. coli* MG1655 data set with a high quality reference genome [20].

## Quality Filtering

We removed adapters with Trimmomatic v0.30 in paired-end mode with the TruSeq adapters [21], using light quality score trimming (`LEADING:2 TRAILING:2 SLIDINGWINDOW:4:2 MINLEN:25`) as recommended in MacManes, 2014 [22].

## Reference Coverage Profile

To evaluate how much of the reference metagenome was contained in the read data, we used `bwa aln` (v0.7.7.r441) to map reads to the reference

124 genome [23]. We then calculated how many reference bases were covered by  
125 mapped reads (custom script `coverage-profile.py`).

## 126 Measuring k-mer inclusion and Jaccard similarity

127 We used MinHashing as implemented in sourmash to estimate k-mer inclu-  
128 sion and Jaccard similarity between data sets [24]. MinHash signatures were  
129 prepared with `sourmash compute` using `--scaled 10000`. K-mer inclusion  
130 was computed by taking the ratio of the number of intersecting hashes with  
131 the query over the total number of hashes in the subject MinHash. Jac-  
132 card similarity was computed as in [25] by taking the ratio of the number  
133 of intersecting hashes between the query and subject over the number of  
134 hashes in the union. K-mer sizes for comparison were chosen at 21, 31, or  
135 51, depending on the level of taxonomic specificity desired - genus, species,  
136 or strain, respectively, as described in [26].

137 Where specified, high-abundance k-mers were selected for counting by  
138 using the script `trim-low-abund.py` script with `-C 5` from khmer v2 [27,  
139 28].

## 140 Assemblers

141 We assembled the quality-filtered reads using three different assemblers:  
142 IDBA-UD [17], MetaSPAdes [18], and MEGAHIT [19]. For IDBA-UD v1.1.1  
143 [17], we used `--pre-correction` to perform pre-correction before assembly  
144 and `-r` for the pe files. IDBA could not ingest the single-ended files so they  
145 were omitted from the assembly.

146 For MetaSPAdes v3.10.1 [18], we used `--meta --pe1-12 --pe1-s` where  
147 `--meta` is used for metagenomic data sets, `--pe1-12` specifies the interlaced  
148 reads for the first paired-end library, and `--pe1-s` provides the orphan reads  
149 remaining from quality trimming.

150 For MEGAHIT v1.1.1-2-g02102e1 [19], we used `-l 101 -m 3e9 --cpu-only`  
151 where `-l` is for maximum read length, `-m` is for max memory in bytes to  
152 be used in constructing the graph, and `--cpu-only` to use only the CPU  
153 and no GPUs. We also used `--presets meta-large` for large and complex  
154 metagenomes, and `--12` and `-r` to specify the interleaved-paired-end and  
155 single-end files respectively. MEGAHIT allows the specification of a memory  
156 limit and we used `-M 1e+10` for 10 GB.

157 All three assemblies were executed on the same XSEDE Jetstream in-  
158 stance (S1.Xxlarge) at Indiana University, running Ubuntu 16.04 (install

159 6/21/17, Ubuntu 16.04 LTS Development + GUI support + Docker; based  
 160 on Ubuntu cloud image for 16.04 LTS with basic dev tools, GUI/Xfce  
 161 added). Assemblers were limited to 16 threads. We recorded RAM and CPU  
 162 time for each assembly using `/usr/bin/time -v`. Install and execute details  
 163 as well as output timings and logs are available in the `pipeline/runstats`  
 164 directory of the Zenodo release.

165 Unless otherwise mentioned, we eliminated all contigs less than 500 bp  
 166 from each assembly prior to further analysis.

## 167 Mapping

168 We aligned all quality-filtered reads to the reference metagenome with `bwa`  
 169 `aln` (v0.7.7.r441) [23]. We aligned paired-end and orphaned reads separately.  
 170 We then used `samtools` (v0.1.19) [29] to convert SAM files to BAM files for  
 171 both paired-end and orphaned reads. To count the unaligned reads, we  
 172 included only those records with the “4” flag in the SAM files [29].

## 173 Assembly analysis using NUCmer

174 We used the NUCmer tool from MUMmer3.23 [30] to align assemblies to the  
 175 reference genome with options `-coords -p`. Then we parsed the generated  
 176 “.coords” file using a custom script `analyze_assembly.py`, and calculated  
 177 several analysis metrics across all three assemblies at a 99% alignment iden-  
 178 tity.

## 179 Reference-based analysis of the assemblies

180 We conducted reference-based analysis of the assemblies under two condi-  
 181 tions. “Loose” alignment conditions used all available alignments, including  
 182 redundant and overlapping alignments. “Strict” alignment conditions took  
 183 only the longest alignment for any given contig, eliminating all other align-  
 184 ments.

185 The script `summarize-coords2.py` was used to calculate aligned cov-  
 186 erage from the loose alignment conditions: each base in the reference was  
 187 marked as “covered” if it was included in at least one alignment. The script  
 188 `analyze_ng50.py` was used to calculate NGA 50 for each individual refer-  
 189 ence genome.

## 190 **Analysis of chimeric misassemblies**

191 We analyzed each assembly for chimeric misassemblies by counting the num-  
 192 ber of contigs that contained matches to two distinct reference genomes. In  
 193 order to remove secondary alignments from consideration, we included only  
 194 the longest non-overlapping NUCmer alignments for each contig at a mini-  
 195 mum alignment identity of 99%. We then used the script `analyze_chimeric2.py`  
 196 to find individual contigs that matched more than one distinct reference  
 197 genome. As a negative control on our analysis, we verified that this ap-  
 198 proach yielded no positive results when applied to the alignments of the  
 199 reference metagenome against itself.

## 200 **Analysis of unmapped reads**

201 We conducted assembly and analysis of unmapped reads with MEGAHIT,  
 202 NUCmer, and sourmash as above. The new GenBank genomes are listed in  
 203 the Zenodo archive at the file `accession-list-unmapped.txt` and for con-  
 204 venience are available for download at the archival URL <https://osf.io/34ef8/>.

## 205 **Results**

### 206 **The raw data is high quality.**

207 The reads contains 11,072,579,096 bp (11.07 Gbp) in 109,629,496 reads with  
 208 101.0 average length (2x101bp Illumina HiSeq).

209 Trimming removed 686,735 reads (0.63%). After trimming, we retained  
 210 108,422,358 paired reads containing 10.94 Gbp with an average length of  
 211 100.9 bases. A total of 46.56 Mbp remained in 520,403 orphan reads with  
 212 an average length of 89.5 bases. In total, the quality trimmed data contained  
 213 10.98 Gbp in 108,942,761 reads. This quality trimmed (“QC”) data set was  
 214 used as the basis for all further analyses.

### 215 **The reference metagenome is not completely present in the** 216 **reads.**

217 We next evaluated the fraction of the reference genome covered by at least  
 218 one read (see Methods for details). Quality filtered reads cover 203,058,414  
 219 (98.76%) bases of the reference metagenome (205,603,715 bp total size). Fig-  
 220 ure 1 shows the cumulative coverage profile of the reference metagenome,

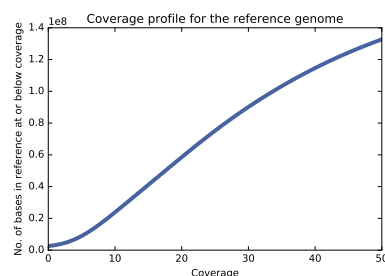

Figure 1: Cumulative coverage profile for the reference metagenome, based on read mapping.

Table 1: Jaccard containment of the reference in the reads

| k-mer size | % reference in reads |
|------------|----------------------|
| 21         | 96.8%                |
| 31         | 95.9%                |
| 41         | 94.9%                |
| 51         | 94.1%                |

221 and the percentage of bases with that coverage. Most of the reference  
 222 metagenome was covered at least minimally; only 3.33% of the reference  
 223 metagenome had mapping coverage  $<5$ , and 1.24% of the bases in the ref-  
 224 erence were not covered by any reads in the QC data set.

225 In order to evaluate reconstructability with De Bruijn graph assemblers,  
 226 we next examined k-mer containment of the reference in the reads for  $k$  of  
 227 21, 31, 41, and 51 (Table 1). The k-mer overlap decreases from 96.8% to  
 228 94.1% as the k-mer size increases. This could be caused by low coverage of  
 229 some portions of the reference and/or variation between the reads and the  
 230 reference.

### 231 Some individual reference genomes are poorly represented in 232 the reads.

233 To see if specific reference genomes exhibited low coverage, we analyzed read  
 234 mapping coverage for individual genomes. Of the 64 reference genomes used  
 235 in the metagenome, 60 had a per-base mapping coverage above 95%. The  
 236 remaining four varied significantly (Table 2), with *F. nucleatum* the lowest –  
 237 only 47.6% of the bases in the reference genome are covered by one or more



Table 2: Top uncovered genomes

| Genome                            | Read coverage |
|-----------------------------------|---------------|
| <i>Desulfovibrio vulgaris</i> DP4 | 93.2%         |
| <i>Thermus thermophilus</i> HB27  | 91.1%         |
| <i>Enterococcus faecalis</i> V583 | 74.6%         |
| <i>Fusobacterium nucleatum</i>    | 47.6%         |

Table 3: Genomes removed from reference for low 51-mer presence

| 51-mers in reads | Genome                                    |
|------------------|-------------------------------------------|
| 98.7             | <i>Leptothrix cholodnii</i>               |
| 98.7             | <i>Haloferax volcanii</i> DS2             |
| 98.6             | <i>Salinispora tropica</i> CNB-440        |
| 97.4             | <i>Deinococcus radiodurans</i>            |
| 97.2             | <i>Zymomonas mobilis</i>                  |
| 97.1             | <i>Ruegeria pomeroyi</i>                  |
| 96.8             | <i>Shewanella baltica</i> OS223           |
| 95.5             | <i>B. bronchiseptica</i> D989             |
| 94.5             | <i>Burkholderia xenovorans</i>            |
| 72.0             | <i>Desulfovibrio vulgaris</i> DP4         |
| 65.0             | <i>Thermus thermophilus</i> HB27          |
| 53.4             | <i>Enterococcus faecalis</i>              |
| 4.7              | <i>Fusobacterium nucleatum</i> ATCC 25586 |

mapped reads.

We next did a 51-mer containment analysis of each reference genome in the reads;  $k=51$  was chosen so as to be specific to strain content [26]. 99% or more of the constituent 51-mers for 51 of the 64 reference genomes were present in the reads, suggesting that each of the 51 genomes was entirely present at some minimal coverage.

We excluded the remaining 13 genomes (see Table 3) from any further reference-based analysis because interpreting recovery and misassembly statistics for these genomes would be confounding; also see the discussion of strain variants, below.

Table 4: Running Time and Memory Utilization

| Assembler  | CPU time | Wall time | RAM (Max RSS) |
|------------|----------|-----------|---------------|
| MEGAHIT    | 1191m    | 1h 33m    | 10 GB         |
| IDBA-UD    | 2117m    | 2h 41m    | 21 GB         |
| MetaSPAdes | 2554m    | 4h 7m     | 28 GB         |

## MEGAHIT is the fastest and lowest-memory assembler evaluated

We ran three commonly used metagenome assemblers on the QC data set: IDBA-UD, MetaSPAdes, and MEGAHIT. We recorded the time and memory usage of each (Table 4). In computational requirements, MEGAHIT outperformed both MetaSPAdes and IDBA-UD, producing an assembly in 1.5 hours (“wall time”) – 1.7 times faster than IDBA and 2.6 times faster than MetaSPAdes. MEGAHIT used only 10 GB of RAM as requested – half to almost a third of the memory used by IDBA and MetaSPAdes, respectively. CPU time measurements (which include processing on multiple CPU cores) show that all three assemblers use multiple cores effectively.

## The assemblies contain most of the raw data

Table 5: Read and high-abundance (> 5) k-mer exclusion from assemblies

| Assembly   | Unmapped Reads    | 51-mers omitted |
|------------|-------------------|-----------------|
| IDBA       | 3,328,674 (3.05%) | 2.4%            |
| MetaSPAdes | 3,844,123 (3.52%) | 3.2%            |
| MEGAHIT    | 2,737,640 (2.51%) | 2.8%            |

We assessed read inclusion in assemblies by mapping the QC reads to the length-filtered assemblies and counting the remaining unmapped reads. Depending on the assembly, between 2.7 million and 3.9 million reads (2.5-3.5%) did not map to the assemblies (Table 5). All of the assemblies included the large majority of high-abundance 51-mers (more than 96.8% in all cases).

## Much of the reference is covered by the assemblies.

We next evaluated the extent to which the assembled contigs recovered the “known/true” metagenome sequence by aligning each assembly to the adjusted reference (Table 6). Each of the three assemblers generates contigs

Table 6: Contig coverage of reference with loose alignment conditions.

| Assembly   | bases aligned | duplication | 51-mers |
|------------|---------------|-------------|---------|
| MEGAHIT    | 94.8%         | 1.0%        | 96.7%   |
| MetaSPAdes | 93.1%         | 1.1%        | 96.2%   |
| IDBA       | 93.6%         | 0.98%       | 97.2%   |

that cover more than 93.1% of the reference metagenome at high identity (99%) with little duplication (approximately 1%). All three assemblies contain between 96.2% and 97.2% of the 51-mers in the reference.

At 99% identity with the loose mapping approach, approximately 2.5% of the reference is missed by all three assemblers, while 1.7% is uniquely covered by MEGAHIT, 0.74% is uniquely covered by MetaSPAdes, and 0.64% is uniquely covered by IDBA.

**The generated contigs are broadly accurate.**

Table 7: Contig accuracy measured by reference coverage with strict alignment.

| Assembly   | % covered |
|------------|-----------|
| MEGAHIT    | 89.3%     |
| IDBA       | 87.7%     |
| MetaSPAdes | 83.4%     |

When counting only the best (longest) alignment per contig at a 99% identity threshold, each of the three assemblies recovers more than 87.3% of the reference, with MEGAHIT recovering the most – 89.3% of the reference (Table 7).

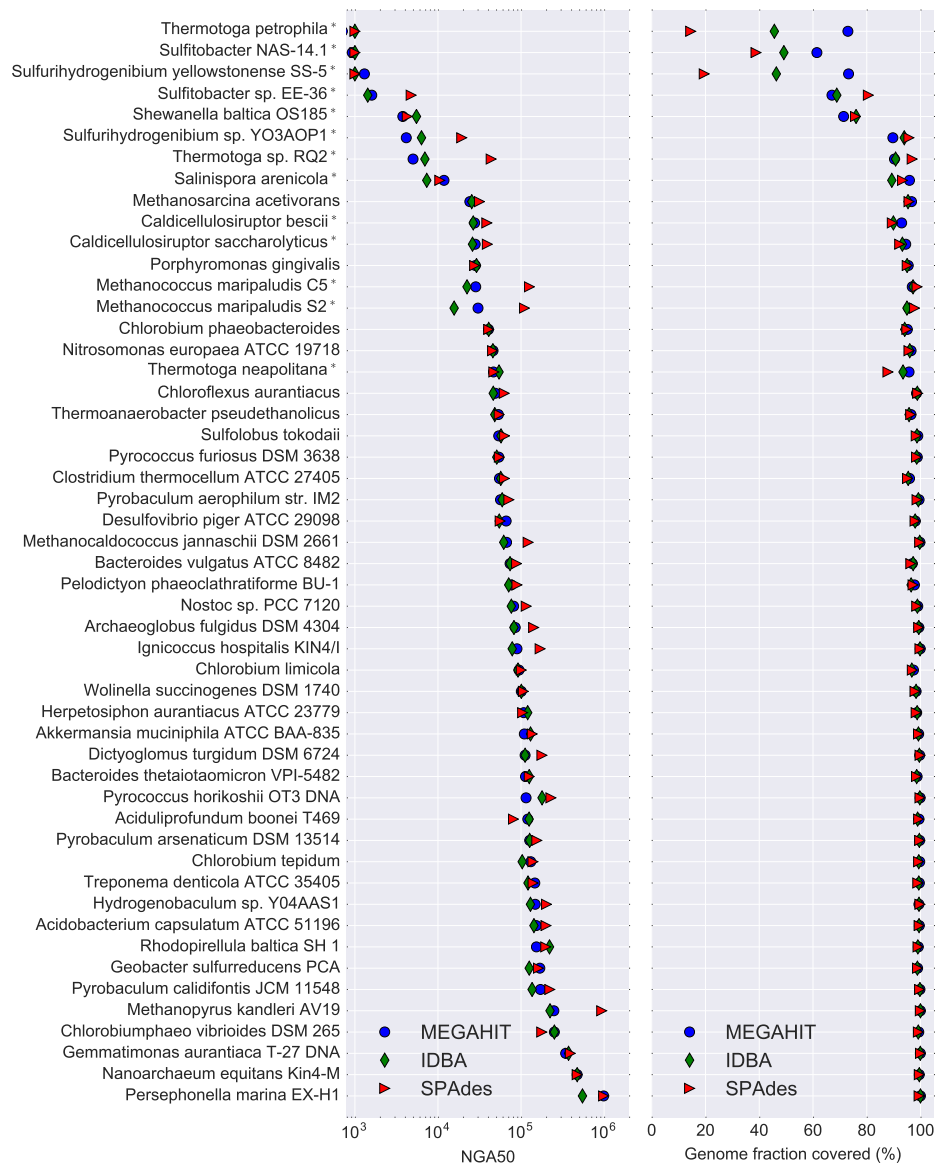

Figure 2: NGA50 and genome fraction covered, by genome and assembler. A '\*' after the name indicates the presence of at least one other genome with > 2% Jaccard similarity at k=31 in the community. Where NGA50 cannot be calculated due to poor coverage, a marker is placed at 1kb.

## 281 Individual genome statistics vary widely in the assemblies.

282 We computed the NGA50 for each individual genome and assembly in order  
283 to compare assembler performance on genome recovery (see left panel of Fig-  
284 ure 2). The NGA50 statistics for individual genomes vary widely, but there  
285 are consistent assembler-specific trends: IDBA yields the lowest NGA50 for  
286 28 of the 51 genomes, while MetaSPAdes yields the highest NGA50 for 32  
287 of the 51 genomes.

288 We also evaluated aligned coverage per genome for each of the three  
289 assemblies (right panel, Figure 2). We found that 13 of the 51 genomes were  
290 missing 5% or more of bases in at least one assembly, despite all 51 genomes  
291 having 99% or higher read- and 51-mer coverage.

292 There are 12 genomes with k=31 Jaccard similarity greater than 2%  
293 to other genomes in the community, and these (denoted by '\*' after the  
294 name) typically had lower NGA50 and aligned coverage numbers than other  
295 genomes. In particular, these constituted 12 of the 13 genomes missing 5%  
296 or more of their content, and the lowest eight NGA50 numbers.

## 297 Longer contigs are less likely to be chimeric.

Table 8: Chimeric contigs by contig length.

| Assembly   | > 50kb | > 5kb | > 500 bp   |
|------------|--------|-------|------------|
| IDBA       | 0      | 1     | 7 (0.06%)  |
| MEGAHIT    | 1      | 4     | 14 (0.13%) |
| MetaSPAdes | 0      | 3     | 30 (0.48%) |

298 Chimerism is the formation of contigs that include sequence from multi-  
299 ple genomes. We evaluated the rate of chimerism in contigs at three different  
300 contig length cutoffs: 500bp, 5kb, and 50kb (Table 8). We found that the  
301 percentage of contigs that match to the genomes of two or more different  
302 species drop as the minimum contig size increases, to the point where only  
303 the MEGAHIT assembly had a single chimeric contig longer than 50kb.  
304 Overall, chimeric misassemblies were rare, with no assembler generating  
305 more than 30 chimeric contigs out of thousands of total contigs.

## 306 The unmapped reads contain strain variants of reference genomes.

307 Approximately 4.8 million reads (4.4%) from the QC data set did not map  
308 anywhere in the reference provided by the authors of [12]. We extracted

Table 9: GenBank genomes detected in assembly of unmapped reads

| match | GenBank genome                                       |
|-------|------------------------------------------------------|
| 44.1% | <i>Fusobacterium</i> sp. OBRC1                       |
| 23.0% | <i>P. ruminis</i> strain ML2                         |
| 18.2% | <i>Thermus thermophilus</i> HB8                      |
| 7.7%  | <i>P. ruminis</i> strain CGMCC                       |
| 8.2%  | <i>Enterococcus faecalis</i> M7                      |
| 7.3%  | <i>F. nucleatum</i> 13_3C                            |
| 3.7%  | <i>F. nucleatum</i> subsp. <i>polymorphum</i>        |
| 2.9%  | <i>Fusobacterium hwasookii</i>                       |
| 1.0%  | <i>E. coli</i> isolate YS                            |
| 1.7%  | <i>F. nucleatum</i> subsp. <i>polymorphum</i> , alt. |
| 1.9%  | <i>F. nucleatum</i> subsp. <i>vincentii</i>          |

and assembled these reads in isolation using MEGAHIT, yielding 6.5 Mbp of assembly in 1711 contigs > 500bp in length. We then did a k-mer inclusion analysis of this assembly against all of the GenBank genomes at k=31, and estimated the fraction of the k-mers that belonged to different species (Table 9). We find that 51.1% of the k-mer content of these contigs positively match to a genome present in GenBank but not in the reference metagenome.

To verify these assignments, we aligned the MEGAHIT assembly of unmapped reads to the GenBank genomes in Table 9 with NUCmer using “loose” alignment criteria. We found that 1.78 Mbp of the contigs aligned at 99% identity or better to these GenBank genomes. We also confirmed that, as expected, there are no matches in this assembly to the full updated reference metagenome.

We note that all but the two *P. ruminis* matches and the *E. coli* isolate YS are strain variants of species that are part of the defined community but are not completely present in the reads (see Table 2). For *Proteiniclasticum ruminis*, there is no closely related species in the mock community design, and very little of the MEGAHIT assembly aligns to known *P. ruminis* genomes at 99%. However, there are many alignments to *P. ruminis* at 94% or higher, for approximately 2.73 Mbp total. This suggests that the unmapped reads contain at least some data from a novel species of *Proteiniclasticum*; this matches the observation in [12] of a contaminating genome from an unknown *Clostridium* spp., as at the time there was no *P. ruminis* genome.

## 333 Discussion

### 334 Assembly recovers basic content sensitively and accurately.

335 All three assemblers performed well in assembling contigs from the con-  
 336 tent that was fully present in reads and k-mers. After length filtering,  
 337 all three assemblies contained more than 95% of the reference (Table 6);  
 338 even with removal of secondary alignments, more than 87% was recovered  
 339 by each assembler (Table 7). About half the constituent genomes had an  
 340 NGA50 of 50kb or higher (Figure 2), which, while low for current Illumina  
 341 single-genome sequencing, is sufficient to recover operon-level relationships  
 342 for many genes.

### 343 The presence of multiple closely related genomes confounds 344 assembly.

345 In agreement with CAMI, we also find that the presence of closely related  
 346 genomes in the metagenome causes loss of assembly [3]. This is clearly shown  
 347 by Figure 2, where 12 of the bottom 14 genomes by NGA50 (left panel)  
 348 also exhibit poor genome recovery by assembly (right panel). Interestingly,  
 349 different assemblers handle this quite differently, with e.g. MetaSPAdes  
 350 failing to recover essentially any of *Thermotoga petrophila*, while MEGAHIT  
 351 recovers 73%. The presence of nearby genomes is an almost perfect predictor  
 352 that one or more assembler will fail to recover 5% or more - of the 13/51  
 353 genomes for which less than 95% is recovered, 12 of them have close genomes  
 354 in the community. Interestingly, very little similarity is needed - all genomes  
 355 with Jaccard similarity of 2% or higher at k=31 exhibit these problems.

356 The *Shewanella baltica* OS185 genome is a good example: there are two  
 357 strain variants, OS185 and OS223, present in the defined community. Both  
 358 are present at more than 99% in the reads, and more than 98% in 51-mers,  
 359 but only 75% of *S. baltica* OS185 and 50% of *S. baltica* OS223 are recovered  
 360 by assemblers. This is a clear case of “strain confusion” where the assemblers  
 361 simply fail to output contigs for a substantial portion of the two genomes.

362 Another interest of this study was to examine cross-species chimeric as-  
 363 sembly, in which a single contig is formed from multiple genomes. In Table 8,  
 364 we show that there is relatively little cross-species chimerism. Surprisingly,  
 365 what little is present is length-dependent: longer contigs are less likely to  
 366 be chimeric. This might well be due to the same “strain confusion” effect  
 367 as above, where contigs that share paths in the assembly graphs are broken  
 368 in twain.

## 369 **MEGAHIT performs best by several metrics.**

370 MEGAHIT is clearly the most efficient computationally, outperforming both  
 371 MetaSPAdes and IDBA in memory and time (Table 4). The MEGAHIT  
 372 assembly also included more of the reads than either IDBA or MetaSPAdes,  
 373 and omitted only 0.4% more of the unique 51-mers from the reads than  
 374 IDBA. MEGAHIT covered more of the reference genome with both loose  
 375 and strict alignments (Table 6 and Table 7), with little duplication. This is  
 376 clearly because of MEGAHIT’s generally superior performance in recovering  
 377 the genomes of closely related strains (Figure 2, right panel). The sum  
 378 “fraction of genome recovered” is arguably the most important measure of  
 379 a metagenome assembler (see [5] in particular) and here MEGAHIT excels  
 380 for individual genomes even in the presence of strain variation.

381 When comparing details of sequence recovery between the assemblers,  
 382 the assembly content differs by only a small amount when loose alignments  
 383 are allowed: all three assemblers miss more content (approximately 2.5% of  
 384 the reference) than they generate uniquely (1.7% or less). In addition to  
 385 preferring no one assembler over any other, this suggests that combining as-  
 386 semblies may have little value in terms of recovering additional metagenome  
 387 content.

## 388 **The missing reference may be present in strain variants of the** 389 **intended species.**

390 Several individual genomes are missing in measurable portion from the QC  
 391 reads (Table 2), and many QC reads (4.4% of 108m) did not map to the  
 392 full reference metagenome. These appear to be related issues: upon anal-  
 393 ysis of the unmapped reads against GenBank, we find that many of the  
 394 contigs assembled from the unmapped reads can be assigned to strain vari-  
 395 ants of the species in the mock community (Table 9). This suggests that  
 396 the constructors of the mock community may have unintentionally included  
 397 strain variants of *Fusobacterium nucleatum*, *Thermus thermophilus* HB27,  
 398 and *Enterococcus faecalis*; note that the microbes used were sourced from  
 399 the community rather than the ATCC (M. Podar, pers. communication). In  
 400 addition, we detect what may be portions of a novel member of the *Proteini-*  
 401 *clasticum* genus in the assembly of these reads - this is likely the *Clostridium*  
 402 spp. detected through amplicon sequencing in [12].

403 Without returning to the original DNA samples, it is impossible to con-  
 404 clusively confirm that unintended strains were used in the construction of the  
 405 mock community. In particular, our analysis is dependent on the genomes in



406 GenBank: the genomes we detect in the contigs are clearly closely related to  
407 GenBank genomes not in the reference metagenome, based on k-mer anal-  
408 ysis and contig alignment. However, GenBank is unlikely to contain the  
409 exact genomes of the actually included strain variants, rendering conclusive  
410 identification impossible.

## 411 Conclusions

412 Overall, assembly of this mock community works well, with good recovery  
413 of known genomic sequence for the majority of genomes. All three assem-  
414 blers that we evaluated recover similar amounts of most genomic sequence,  
415 but (recapitulating several other studies [3, 5, 15]) MEGAHIT is compu-  
416 tationally the most efficient of the three. We note that assembly resolves  
417 substantial portions of several previously undetected strain variants, as well  
418 as recovering a substantial portion of a novel *Proteiniclasticum* spp. that  
419 was detected via amplicon analysis in [12], suggesting that assembly is a  
420 useful complement to amplicon or reference-based analyses.

421 The presence of closely related strains is a major confounder of metagenome  
422 assembly, and causes assemblers to drop considerable portions of genomes  
423 that (based on read mapping and k-mer inclusion) are clearly present. In this  
424 relatively simple community, this strain confusion is present but does not  
425 dominate the assembly. However, real microbial communities are likely to  
426 have many closely related strains and any resulting loss of assembly would  
427 be hard to detect in the absence of good reference genomes. While high  
428 polymorphism rates in e.g. animal genomes are known to cause duplication  
429 or loss of assembly, some solutions have emerged that make use of assump-  
430 tions of uniform coverage and diploidy [31]. These solutions cannot however  
431 be transferred directly to metagenomes, which have unknown abundance  
432 distributions and strain content.

433 An additional concern is that metagenome assemblies are often per-  
434 formed after pooling data sets to increase coverage (e.g. [4, 32]); this pooled  
435 data is more likely to contain multiple strains, which would then in turn  
436 adversely affect assembly of strains. This may not be resolvable within the  
437 current paradigm of assembly, which focuses on outputting linear assem-  
438 blies that cannot properly represent strain variation. The human genomics  
439 community is moving towards using *reference graphs*, which can represent  
440 multiple incompatible variants in a single data structure [33]; this approach,  
441 however, requires high-quality isolate reference genomes, which are generally  
442 unavailable for environmental microbes.

443 Long read sequencing (and related technologies) will undoubtedly help  
 444 resolve strain variation in the future, but even with highly accurate long-  
 445 read sequencing, current sequencing depth is still too low to resolve deep  
 446 environmental metagenomes [34, 35]. It is unclear how well long error-  
 447 prone reads (such as those output by Pacific Biosciences SMRT [36] and  
 448 Oxford Nanopore instruments [37]) will perform on complex metagenomes:  
 449 with high error rates, deep coverage of each individual genome is required  
 450 to achieve accurate assembly, and this may not be easily obtainable for  
 451 complex communities. Single-molecule barcoding (e.g. 10X Genomics [38])  
 452 and HiC approaches [39] show promise but these remain untested on well-  
 453 defined complex communities and are still challenged by the complexity of  
 454 complex environmental metagenomes; see [40, 41, 42].

455 Much of our analysis above depends on having a high-quality “mock”  
 456 metagenome. While computationally constructed synthetic communities  
 457 and computational “spike-ins” to real data sets can provide valuable controls  
 458 (e.g. see [15] and [43]) we strongly believe that standardized communities  
 459 constructed *in vitro* and sequenced with the latest technologies are critical to  
 460 the evaluation of both canonical and emerging tools, e.g. efforts such as [44].  
 461 From the perspective of tool evaluation, we must disagree somewhat with  
 462 Vollmers et al. [5]: good metagenome tool evaluation necessarily depends on  
 463 mock communities that are as realistic as we can make them. Likewise, from  
 464 the perspective of bench biologists, actually sequencing real DNA is critical  
 465 because it can evaluate confounding effects such as kit contamination [45].  
 466 Large-scale studies of computational approaches systematically applied to  
 467 mock communities such as CAMI [3] can then provide fair comparisons of  
 468 entire toolchains (wet + dry) applied to these mock communities.

469 We omitted two important questions in this study: binning and choice  
 470 of parameters. We chose not to evaluate genome binning because most  
 471 binning strategies either operate post-assembly (see e.g. [46]), in which  
 472 case the challenges with assembly discussed above will apply; or require  
 473 multiple samples (e.g. [47]), which we do not have. We also chose to use  
 474 only default parameters with all three assemblers, for two reasons. First,  
 475 we are not aware of any widely used automated approaches for determining  
 476 the “best” set of parameters or evaluating the output, other than those  
 477 integrated into the assemblers themselves (e.g. choice of k-mer sizes), and  
 478 absent such guidance we do not feel comfortable blessing any particular set of  
 479 parameters; here the choice of default parameters is parsimonious. Second,  
 480 any parameter exploration pipeline would not only need to be automated  
 481 but would need to run multiple assemblies, whose time and resource usage

482 should be measured; in this case, any comparison based on runtime of the  
483 parameter choice pipeline should naturally favor MEGAHIT because of its  
484 advantage in computational efficiency.

## 485 **Author contributions**

486 SA, LI and CTB developed, tested, and executed the analytical pipeline.  
487 SA and CTB created the tables and figures and wrote the paper.

## 488 **Competing interests**

489 No competing interest to our knowledge.

## 490 **Grant information**

491 This work is funded by Gordon and Betty Moore Foundation Grant GBMF4551  
492 and NIH NHGRI R01 grant HG007513-03, both to CTB.

## 493 **Acknowledgments**

494 We thank Michael R. Crusoe and Phillip T. Brooks for input on analysis and  
495 pipeline development. We thank Migun Shakya, Mircea Podar, Jiarong Guo,  
496 Harald R. Gruber-Vodicka, Juliane Wippler, Krista Ternus, and Stephen  
497 Turner for valuable comments on drafts of this manuscript.

## 498 **References**

- 499 [1] Jay Ghurye, Victoria Cepeda-Espinoza, and Mihai Pop. Metagenomic assem-  
500 bly: Overview, challenges and applications. *The Yale Journal of Biology and*  
501 *Medicine*, 89(3):353–362, 2016.
- 502 [2] Nikos C. Kyrpides, Philip Hugenholtz, Jonathan A. Eisen, Tanja Woyke,  
503 Markus Göker, Charles T. Parker, Rudolf Amann, Brian J. Beck, Patrick S. G.  
504 Chain, Jongsik Chun, Rita R. Colwell, Antoine Danchin, Peter Dawyndt, Tom  
505 Dedeurwaerdere, Edward F. DeLong, John C. Detter, Paul De Vos, Timothy J.  
506 Donohue, Xiu-Zhu Dong, Dusko S. Ehrlich, Claire Fraser, Richard Gibbs, Jack  
507 Gilbert, Paul Gilna, Frank Oliver Glöckner, Janet K. Jansson, Jay D. Keasling,  
508 Rob Knight, David Labeda, Alla Lapidus, Jung-Sook Lee, Wen-Jun Li, Juncai  
509 MA, Victor Markowitz, Edward R. B. Moore, Mark Morrison, Folker Meyer,  
510 Karen E. Nelson, Moriya Ohkuma, Christos A. Ouzounis, Norman Pace, Julian  
511 Parkhill, Nan Qin, Ramon Rossello-Mora, Johannes Sikorski, David Smith,

- 512 Mitch Sogin, Rick Stevens, Uli Stingl, Ken ichiro Suzuki, Dorothea Taylor,  
513 Jim M. Tiedje, Brian Tindall, Michael Wagner, George Weinstock, Jean Weis-  
514 senbach, Owen White, Jun Wang, Lixin Zhang, Yu-Guang Zhou, Dawn Field,  
515 William B. Whitman, George M. Garrity, and Hans-Peter Klenk. Genomic  
516 encyclopedia of bacteria and archaea: Sequencing a myriad of type strains.  
517 *PLoS Biology*, 12(8):e1001920, aug 2014. doi: 10.1371/journal.pbio.1001920.  
518 URL <https://doi.org/10.1371/journal.pbio.1001920>.
- 519 [3] Alexander Sczyrba, Peter Hofmann, Peter Belmann, David Koslicki, Stefan  
520 Janssen, Johannes Droege, Ivan Gregor, Stephan Majda, Jessika Fiedler,  
521 Eik Dahms, Andreas Bremges, Adrian Fritz, Ruben Garrido-Oter, Tue  
522 Sparholt Jorgensen, Nicole Shapiro, Philip D Blood, Alexey Gurevich, Yang  
523 Bai, Dmitriy Turaev, Matthew Z DeMaere, Rayan Chikhi, Niranjana Nagara-  
524 jan, Christopher Quince, Lars Hestbjerg Hansen, Soren J Sorensen, Burton  
525 K H Chia, Bertrand Denis, Jeff L Froula, Zhong Wang, Robert Egan, Dong-  
526 wan Don Kang, Jeffrey J Cook, Charles Deltel, Michael Beckstette, Claire  
527 Lemaitre, Pierre Peterlongo, Guillaume Rizk, Dominique Lavenier, Yu-Wei  
528 Wu, Steven W Singer, Chirag Jain, Marc Strous, Heiner Klingenberg, Peter  
529 Meinicke, Michael Barton, Thomas Lingner, Hsin-Hung Lin, Yu-Chieh Liao,  
530 Genivaldo Gueiros Z. Silva, Daniel A Cuevas, Robert A Edwards, Surya Saha,  
531 Vitor C Piro, Bernhard Y Renard, Mihai Pop, Hans-Peter Klenk, Markus  
532 Goeker, Nikos Kyrpides, Tanja Woyke, Julia A Vorholt, Paul Schulze-Lefert,  
533 Edward M Rubin, Aaron E Darling, Thomas Rattei, and Alice C McHardy.  
534 Critical assessment of metagenome interpretation - a benchmark of compu-  
535 tational metagenomics software. *bioRxiv*, 2017. doi: 10.1101/099127. URL  
536 <http://biorxiv.org/content/early/2017/01/09/099127>.
- 537 [4] I. Sharon, M. J. Morowitz, B. C. Thomas, E. K. Costello, D. A. Relman,  
538 and J. F. Banfield. Time series community genomics analysis reveals rapid  
539 shifts in bacterial species, strains, and phage during infant gut colonization.  
540 *Genome Research*, 23(1):111–120, aug 2012. doi: 10.1101/gr.142315.112. URL  
541 <https://doi.org/10.1101/gr.142315.112>.
- 542 [5] John Vollmers, Sandra Wiegand, and Anne-Kristin Kaster. Compar-  
543 ing and evaluating metagenome assembly tools from a microbiol-  
544 ogist’s perspective - not only size matters! *PLOS ONE*, 12  
545 (1):e0169662, jan 2017. doi: 10.1371/journal.pone.0169662. URL  
546 <https://doi.org/10.1371/journal.pone.0169662>.
- 547 [6] Jorge F Vázquez-Castellanos, Rodrigo García-López, Vicente Pérez-Brocal,  
548 Miguel Pignatelli, and Andrés Moya. Comparison of different assembly and  
549 annotation tools on analysis of simulated viral metagenomic communities in  
550 the gut. *BMC genomics*, 15(1):1, 2014.
- 551 [7] Konstantinos Mavromatis, Natalia Ivanova, Kerrie Barry, Harris Shapiro, Eu-  
552 gene Goltsman, Alice C McHardy, Isidore Rigoutsos, Asaf Salamov, Frank

- 553 Korzeniewski, Miriam Land, et al. Use of simulated data sets to evaluate the  
554 fidelity of metagenomic processing methods. *Nature methods*, 4(6):495–500,  
555 2007.
- 556 [8] David B Jaffe, Jonathan Butler, Sante Gnerre, Evan Mauceli, Kerstin  
557 Lindblad-Toh, Jill P Mesirov, Michael C Zody, and Eric S Lander. Whole-  
558 genome sequence assembly for mammalian genomes: Arachne 2. *Genome*  
559 *research*, 13(1):91–96, 2003.
- 560 [9] Samuel Aparicio, Jarrod Chapman, Elia Stupka, Nik Putnam, Jer-ming Chia,  
561 Paramvir Dehal, Alan Christoffels, Sam Rash, Shawn Hoon, Arian Smit, et al.  
562 Whole-genome shotgun assembly and analysis of the genome of *fugu rubripes*.  
563 *Science*, 297(5585):1301–1310, 2002.
- 564 [10] Anveshi Charuvaka and Huzefa Rangwala. Evaluation of short read metage-  
565 nomic assembly. *BMC genomics*, 12(2):1, 2011.
- 566 [11] Jared T Simpson, Kim Wong, Shaun D Jackman, Jacqueline E Schein,  
567 Steven JM Jones, and Inanç Birol. Abyss: a parallel assembler for short read  
568 sequence data. *Genome research*, 19(6):1117–1123, 2009.
- 569 [12] Shakya Migun, Christopher Quince, James Campbell, Zamin Yang, Christo-  
570 pher Schadt, and Mircea Podar. Comparative metagenomic and rrna microbial  
571 diversity characterization using archaeal and bacterial synthetic communities.  
572 *Enivromental Microbiology*, 15(6):1882–1899, 2013.
- 573 [13] Brandon K. B. Seah and Harald R. Gruber-Vodicka. gbtools: In-  
574 teractive visualization of metagenome bins in r. *Frontiers in Mi-*  
575 *crobiology*, 6, dec 2015. doi: 10.3389/fmicb.2015.01451. URL  
576 <https://doi.org/10.3389/fmicb.2015.01451>.
- 577 [14] Dinghua Li, Ruibang Luo, Chi-Man Liu, Chi-Ming Leung, Hing-  
578 Fung Ting, Kunihiko Sadakane, Hiroshi Yamashita, and Tak-Wah  
579 Lam. MEGAHIT v1.0: A fast and scalable metagenome assembler  
580 driven by advanced methodologies and community practices. *Meth-*  
581 *ods*, 102:3–11, jun 2016. doi: 10.1016/j.ymeth.2016.02.020. URL  
582 <https://doi.org/10.1016/j.ymeth.2016.02.020>.
- 583 [15] Andries Johannes van der Walt, Marc Warwick Van Goethem,  
584 Jean-Baptiste Ramond, Thulani Peter Makhalanyane, Oleg Reva,  
585 and Don Arthur Cowan. Assembling metagenomes, one com-  
586 munity at a time. *bioRxiv*, 2017. doi: 10.1101/120154. URL  
587 <http://biorxiv.org/content/early/2017/06/06/120154>.
- 588 [16] William W. Greenwald, Niels Klitgord, Victor Seguritan, Shibu Yooseph,  
589 J. Craig Venter, Chad Garner, Karen E. Nelson, and Weizhong Li. Utilization  
590 of defined microbial communities enables effective evaluation of meta-genomic

- assemblies. *BMC Genomics*, 18(1), apr 2017. doi: 10.1186/s12864-017-3679-5. URL <https://doi.org/10.1186/s12864-017-3679-5>.
- [17] Yu Peng, Henry C.M. Leung, S.M. Yiu, and Francis Y.L. Chin. Idba-ud: a de novo assembler for single-cell and metagenomic sequencing data with highly uneven depth. *Bioinformatics*, 28:1420–1428, 2012.
- [18] Sergey Nurk, Dmitry Meleshko, Anton Korobeynikov, and Pavel A. Pevzner. metaSPAdes: a new versatile metagenomic assembler. *Genome Research*, 27(5):824–834, mar 2017. doi: 10.1101/gr.213959.116. URL <https://doi.org/10.1101/gr.213959.116>.
- [19] Dinghua Li, Ruibang Luo, Chi-Man Liu, Chi-Ming Leung, Hing-Fung Ting, Kunihiko Sadakane, Hiroshi Yamashita, and Tak-Wah Lam. Megahit v1. 0: A fast and scalable metagenome assembler driven by advanced methodologies and community practices. *Methods*, 102:3–11, 2016.
- [20] H Chitsaz, JL Yee-Greenbaum, G Tesler, MJ Lombardo, CL Dupont, JH Badger, M Novotny, DB Rusch, LJ Fraser, NA Gormley, O Schulz-Trieglaff, GP Smith, DJ Evers, PA Pevzner, and RS Lasken. Efficient de novo assembly of single-cell bacterial genomes from short-read data sets. *Nat Biotechnol*, 29(10):915–21, 2011.
- [21] Anthony M. Bolger, Marc Lohse, and Bjoern Usadel. Trimmomatic: A flexible trimmer for illumina sequence data. *Bioinformatics*, 30(15):2114–2120, 2014.
- [22] Matthew D MacManes. On the optimal trimming of high-throughput mrna sequence data. *Frontiers in genetics*, 5:13, 2014.
- [23] Heng Li and Richard Durbin. Fast and accurate short read alignment with burrows-wheeler transform. *Bioinformatics*, 25(14):1754–1760, 2009.
- [24] C. Titus Brown and Luiz Irber. sourmash: a library for MinHash sketching of DNA. *The Journal of Open Source Software*, 1(5), sep 2016. doi: 10.21105/joss.00027. URL <https://doi.org/10.21105/joss.00027>.
- [25] Brian D. Ondov, Todd J. Treangen, Páll Melsted, Adam B. Mallonee, Nicholas H. Bergman, Sergey Koren, and Adam M. Phillippy. Mash: fast genome and metagenome distance estimation using MinHash. *Genome Biology*, 17(1), jun 2016. doi: 10.1186/s13059-016-0997-x. URL <https://doi.org/10.1186/s13059-016-0997-x>.
- [26] David Koslicki and Daniel Falush. Metapalette: a k-mer painting approach for metagenomic taxonomic profiling and quantification of novel strain variation. *mSystems*, 1(3), 2016. doi: 10.1128/mSystems.00020-16. URL <http://msystems.asm.org/content/1/3/e00020-16>.

- 627 [27] Zhang Qingpeng, Awad Sherine, and Brown Titus. Crossing the streams:  
628 a framework for streaming analysis of short dna sequencing reads. *PeerJ*  
629 *PrePrints* 3:e1100 <https://dx.doi.org/10.7287/peerj.preprints.890v1>, 2015.
- 630 [28] MR Crusoe, HF Alameldin, S Awad, E Boucher, A Caldwell, R Cartwright,  
631 A Charbonneau, B Constantinides, G Edverson, S Fay, J Fenton, T Fenzl,  
632 J Fish, L Garcia-Gutierrez, P Garland, J Gluck, I Gonzlez, S Guermond,  
633 J Guo, A Gupta, JR Herr, A Howe, A Hyer, A Hrpfer, L Irber, R Kidd,  
634 D Lin, J Lippi, T Mansour, P McA’Nulty, E McDonald, J Mizzi, KD Mur-  
635 ray, JR Nahum, K Nanlohy, AJ Nederbragt, H Ortiz-Zuazaga, J Ory, J Pell,  
636 C Pepe-Ranne, ZN Russ, E Schwarz, C Scott, J Seaman, S Sievert, J Simp-  
637 son, CT Skennerton, J Spencer, R Srinivasan, D Standage, JA Stapleton,  
638 SR Steinman, J Stein, B Taylor, W Trimble, HL Wiencko, M Wright,  
639 B Wyss, Q Zhang, e zyme, and CT Brown. The khmer software pack-  
640 age: enabling efficient nucleotide sequence analysis [version 1; referees: 2 ap-  
641 proved, 1 approved with reservations]. *F1000Research*, 4(900), 2015. doi:  
642 10.12688/f1000research.6924.1.
- 643 [29] Heng Li, Bob Handsaker, Alec Wysoker, Tim Fennell, Jue Ruan, Nils Homer,  
644 Gabor Marth, Goncalo Abecasis, Richard Durbin, et al. The sequence align-  
645 ment/map format and samtools. *Bioinformatics*, 25(16):2078–2079, 2009.
- 646 [30] Stefan Kurtz, Adam Phillippy, Arthur L Delcher, Michael Smoot, Martin  
647 Shumway, Corina Antonescu, and Steven L Salzberg. Versatile and open soft-  
648 ware for comparing large genomes. *Genome biology*, 5(2):1, 2004.
- 649 [31] J. H. Kim, M. S. Waterman, and L. M. Li. Diploid genome reconstruc-  
650 tion of ciona intestinalis and comparative analysis with ciona savignyi.  
651 *Genome Research*, 17(7):1101–1110, jun 2007. doi: 10.1101/gr.5894107. URL  
652 <https://doi.org/10.1101/gr.5894107>.
- 653 [32] Ping Hu, Lauren Tom, Andrea Singh, Brian C. Thomas, Brett J. Baker,  
654 Yvette M. Piceno, Gary L. Andersen, and Jillian F. Banfield. Genome-  
655 resolved metagenomic analysis reveals roles for candidate phyla and other  
656 microbial community members in biogeochemical transformations in oil reser-  
657 vairs. *mBio*, 7(1):e01669–15, jan 2016. doi: 10.1128/mbio.01669-15. URL  
658 <https://doi.org/10.1128/mbio.01669-15>.
- 659 [33] Benedict Paten, Adam M Novak, Jordan M Eizenga, and Erik Garrison.  
660 Genome graphs and the evolution of genome inference. *Genome research*,  
661 27(5):665–676, 2017.
- 662 [34] Itai Sharon, Michael Kertesz, Laura A. Hug, Dmitry Pushkarev, Timothy A.  
663 Blauwkamp, Cindy J. Castelle, Mojgan Amirebrahimi, Brian C. Thomas,  
664 David Burstein, Susannah G. Tringe, Kenneth H. Williams, and Jillian F.  
665 Banfield. Accurate, multi-kb reads resolve complex populations and de-  
666 tect rare microorganisms. *Genome Research*, 25(4):534–543, feb 2015. doi:  
667 10.1101/gr.183012.114. URL <https://doi.org/10.1101/gr.183012.114>.



- [35] Richard Allen White, Eric M. Bottos, Taniya Roy Chowdhury, Jeremy D. Zucker, Colin J. Brislawn, Carrie D. Nicora, Sarah J. Fansler, Kurt R. Glaesemann, Kevin Glass, and Janet K. Jansson. Molecule long-read sequencing facilitates assembly and genomic binning from complex soil metagenomes. *mSystems*, 1(3):e00045–16, jun 2016. doi: 10.1128/msystems.00045-16. URL <https://doi.org/10.1128/msystems.00045-16>.
- [36] J. Eid, A. Fehr, J. Gray, K. Luong, J. Lyle, G. Otto, P. Peluso, D. Rank, P. Baybayan, B. Bettman, A. Bibillo, K. Bjornson, B. Chaudhuri, F. Christians, R. Cicero, S. Clark, R. Dalal, A. deWinter, J. Dixon, M. Foquet, A. Gaertner, P. Hardenbol, C. Heiner, K. Hester, D. Holden, G. Kearns, X. Kong, R. Kuse, Y. Lacroix, S. Lin, P. Lundquist, C. Ma, P. Marks, M. Maxham, D. Murphy, I. Park, T. Pham, M. Phillips, J. Roy, R. Sebra, G. Shen, J. Sorenson, A. Tomaney, K. Travers, M. Trulson, J. Vieceli, J. Wegener, D. Wu, A. Yang, D. Zaccarin, P. Zhao, F. Zhong, J. Korlach, and S. Turner. Real-time DNA sequencing from single polymerase molecules. *Science*, 323(5910):133–138, jan 2009. doi: 10.1126/science.1162986. URL <https://doi.org/10.1126/science.1162986>.
- [37] Gerald M Cherf, Kate R Lieberman, Hytham Rashid, Christopher E Lam, Kevin Karplus, and Mark Akeson. Automated forward and reverse ratcheting of DNA in a nanopore at 5-AA precision. *Nature Biotechnology*, 30(4):344–348, feb 2012. doi: 10.1038/nbt.2147. URL <https://doi.org/10.1038/nbt.2147>.
- [38] Eli Moss, Alex Bishara, Ekaterina Tkachenko, Joyce B Kang, Tessa M Andermann, Christina Wood, Christine Handy, Hanlee Ji, Serafim Batzoglou, and Ami S Bhatt. De novo assembly of microbial genomes from human gut metagenomes using barcoded short read sequences. *bioRxiv*, 2017. doi: 10.1101/125211. URL <http://biorxiv.org/content/early/2017/04/07/125211>.
- [39] Caiti Smukowski Heil, Joshua N. Burton, Ivan Liachko, Anne Friedrich, Noah A. Hanson, Cody L. Morris, Joseph Schacherer, Jay Shendure, James H. Thomas, and Maitreya J. Dunham. Identification of a novel interspecific hybrid yeast from a metagenomic open fermentation sample using hi-c. *bioRxiv*, 2017. doi: 10.1101/150722. URL <http://biorxiv.org/content/early/2017/06/15/150722>.
- [40] Joshua N. Burton, Ivan Liachko, Maitreya J. Dunham, and Jay Shendure. Species-level deconvolution of metagenome assemblies with hi-c-based contact probability maps. *G3*, 4(7):1339–1346, may 2014. doi: 10.1534/g3.114.011825. URL <https://doi.org/10.1534/g3.114.011825>.
- [41] Martial Marbouty, Axel Cournac, Jean-François Flot, Hervé Marie-Nelly, Julien Mozziconacci, and Romain Koszul. Metagenomic chromosome conformation capture (meta3c) unveils the diversity of chromosome organiza-



- tion in microorganisms. *eLife*, 3, dec 2014. doi: 10.7554/elife.03318. URL <https://doi.org/10.7554/elife.03318>.
- [42] Christopher W. Beitel, Lutz Froenicke, Jenna M. Lang, Ian F. Korf, Richard W. Micheltmore, Jonathan A. Eisen, and Aaron E. Darling. Strain- and plasmid-level deconvolution of a synthetic metagenome by sequencing proximity ligation products. *PeerJ*, 2:e415, may 2014. doi: 10.7717/peerj.415. URL <https://doi.org/10.7717/peerj.415>.
- [43] Adina Chuang Howe, Janet K Jansson, Stephanie A Malfatti, Susannah G Tringe, James M Tiedje, and C Titus Brown. Tackling soil diversity with the assembly of large, complex metagenomes. *Proceedings of the National Academy of Sciences*, 111(13):4904–4909, 2014.
- [44] Bonnie L. Brown, Mick Watson, Samuel S. Minot, Maria C. Rivera, and Rima B. Franklin. MinION<sup>TM</sup> nanopore sequencing of environmental metagenomes: a synthetic approach. *GigaScience*, 6(3):1–10, feb 2017. doi: 10.1093/gigascience/gix007. URL <https://doi.org/10.1093/gigascience/gix007>.
- [45] Susannah J Salter, Michael J Cox, Elena M Turek, Szymon T Calus, William O Cookson, Miriam F Moffatt, Paul Turner, Julian Parkhill, Nicholas J Loman, and Alan W Walker. Reagent and laboratory contamination can critically impact sequence-based microbiome analyses. *BMC Biology*, 12(1), nov 2014. doi: 10.1186/s12915-014-0087-z. URL <https://doi.org/10.1186/s12915-014-0087-z>.
- [46] Cedric C Laczny, Christina Kiefer, Valentina Galata, Tobias Fehlmann, Christina Backes, and Andreas Keller. Busybee web: metagenomic data analysis by bootstrapped supervised binning and annotation. *Nucleic Acids Research*, page gkx348, 2017.
- [47] Brian Cleary, Ilana Lauren Brito, Katherine Huang, Dirk Gevers, Terrance Shea, Sarah Young, and Eric J Alm. Detection of low-abundance bacterial strains in metagenomic datasets by eigengenome partitioning. *Nature Biotechnology*, 33(10):1053–1060, sep 2015. doi: 10.1038/nbt.3329. URL <https://doi.org/10.1038/nbt.3329>.
